# Supplementary material for: Janus nanozyme–drug nanosystems for synergistic anti-inflammatory treatment of nasal polyps
Source: Royal Society of Chemistry journal article supplement (doi:10.1039/d0ce00450b), 2020-01-01
Supplement: d0ce00450b1.pdf [file d0ce00450b1.pdf]

## Electronic Supplementary Information (ESI)

### Janus Nanozymes-drug Nanosystems for Synergistic Anti-inflammatory

#### Treatment of Nasal Polyps

Ziming Liang,<sup>a</sup> Qian Xiu,<sup>b</sup> Leichao Zhang,<sup>c</sup> Yuzhou Gao,<sup>d</sup> Shengnan Li,<sup>a</sup> Lingyu Zhang,<sup>\*a</sup>

Xiangjun Chen,<sup>a</sup> Lu Li,<sup>\*a</sup> and Chungang Wang<sup>\*a</sup>

a Department of Chemistry, Northeast Normal University, 5268 Renmin Street, Changchun, Jilin, P. R. China, 130024

b Department of Otolaryngology-Head and Neck Surgery, China-Japan Union Hospital, Jilin University, Changchun, China

c Department of Pathology, China-Japan Union Hospital of Jilin University, Changchun, Jilin, 130033

d Suzhou Institute of Biomedical Engineering and Technology Chinese Academy of Sciences, No. 88, Keling Road, Suzhou New District, Jiangsu Province, PR China

E-mail: [zhangly827@nenu.edu.cn](mailto:zhangly827@nenu.edu.cn), [lil106@nenu.edu.cn](mailto:lil106@nenu.edu.cn), [wangcg925@nenu.edu.cn](mailto:wangcg925@nenu.edu.cn).

### Experimental Section

**Materials.** Tetraethyl orthosilicate (TEOS  $\geq 98\%$ ), polyacrylic acid (PAA,  $M_w \approx 1800$ ), lipopolysaccharide (LPS) and hydrogen tetrachloroaurate ( $\text{HAuCl}_4 \cdot \text{H}_2\text{O}$ ) were purchased from Sigma (USA). Isopropyl alcohol (IPA), sodium hydroxide (NaOH), cerium nitrate hexahydrate ( $\text{Ce}(\text{NO}_3)_3 \cdot 6\text{H}_2\text{O}$ , 99.95 %) and aqueous ammonia solution were purchased from Sinopharm Chemical Reagent Beijing Co., Ltd. DSS, nitro blue tetrazolium (NBT) and salicylic acid (SA) were purchased from Energy Chemical. Hydrogen peroxide ( $\text{H}_2\text{O}_2$ , 30 %) was purchased from Beijing Chemical Works. 2',7'-dichlorofluorescein diacetate (DCFH-DA) was purchased from

Beyotime Chemical Reagent Co., Ltd.

**Characterization.** Transmission electron micrographs (TEM) were taken by JEOL-2100F transmission electron microscope under a 200 kV accelerating voltage. UV-Vis spectra were recorded at room temperature on a Japan JASCO V-570 spectrometer fluorescence spectrophotometer. X-ray photoelectron spectra (XPS) were measured by an ECSALAB 250 using non-mono-chromatized Al-K $\alpha$  radiation. N<sub>2</sub> sorption analysis was performed by an intelligent gravimetric analyzer Autosorb-iQ (Quantachrome). Confocal laser scanning microscopy (CLSM) was observed by means of an Olympus Fluoview FV1000. Flow cytometric (FCM) analysis was performed by BD FACSCanto™ II Flow Cytometry. Inductively coupled plasma atomic emission spectroscopy (ICP-AES) was measured with Leeman ICP-AES Prodigy.

**Synthesis of Au-PAA JNPs.** First, the monodisperse 60 nm Au NPs were prepared by reducing tetrachloroauric acid with formaldehyde (37 wt %). All the as-synthesized Au NPs were centrifuged and dispersed into 20 mL deionized water. Then, aqueous PAA solution (0.2 g mL<sup>-1</sup>, 100  $\mu$ L) and NH<sub>3</sub>·H<sub>2</sub>O (2 M, 150  $\mu$ L) were added and stirred for 0.5 h. After that, 60 mL of IPA was dropped into the mixture to obtain the Au-PAA JNPs under magnetic stirring.

**Synthesis of Au-Ce(OH)<sub>3</sub> JNPs.** 30 mg of Cerium(III) nitrate hexahydrate (Ce(NO<sub>3</sub>)<sub>3</sub>·6H<sub>2</sub>O, dissolved in 500  $\mu$ L of water) was added to the suspension of as-synthesized Au-PAA JNPs under vigorous magnetic stirring for 12 h to obtain the Au-Ce(OH)<sub>3</sub> JNPs.

**Synthesis of (Janus Au-Ce(OH)<sub>3</sub>)@SiO<sub>2</sub> NPs.** The Au-Ce(OH)<sub>3</sub> JNPs were washed with water twice and then dispersed into the mixed 20 mL of deionized water and 60 mL of IPA. The pH value of suspension was adjusted to 8.5 with NH<sub>3</sub>·H<sub>2</sub>O solution. Then, TEOS solution (20 % in IPA, 500  $\mu$ L) was added with agitation for 12 h at room temperature to obtain (Janus Au-

Ce(OH)<sub>3</sub>@SiO<sub>2</sub> NPs. Thereafter, the resulting NPs were collected by centrifugation and washed with deionized water for three times to remove the excess precursors. The NPs were then placed in a vacuum drying chamber for 12 h.

**Synthesis of monodisperse Au-CeO<sub>2</sub> JNPs and surface modification.** The (Janus Au-Ce(OH)<sub>3</sub>@SiO<sub>2</sub> NPs were calcined at 600 °C for 2 h to obtain monodisperse (Janus Au-CeO<sub>2</sub>)@SiO<sub>2</sub> NPs. The resulting JNPs were dispersed in water (4 mL) and then etched with aqueous NaOH (2 M, 200 µL) at 50 °C for 24 h. Thereafter, the Au-CeO<sub>2</sub> JNPs were collected by centrifugation and washed with deionized water for several times. After washing, 1 mL of PEG (M<sub>w</sub> ≈ 5000, 10 mg mL<sup>-1</sup> in H<sub>2</sub>O) was added and sonicated for 30 min. After that, the mixed solution was stirred overnight and the PEG modified Au-CeO<sub>2</sub> JNPs were collected after washing twice to remove the excess PEG-SH.

**Synthesis of CeO<sub>2</sub> NPs.** In a 500 mL conical flask, a PAA aqueous solution (0.2 g mL<sup>-1</sup>, 1 mL) and NH<sub>3</sub>·H<sub>2</sub>O (2 M, 1 mL) were added in deionized water (100 mL) and ultrasonically dispersed for 30 min. After that, IPA (400 mL) was dripped to the flask under magnetic stirring to form a suspension. Subsequently, 350 mg Ce(NO<sub>3</sub>)<sub>3</sub>·6H<sub>2</sub>O was added into the suspension under magnetic stirring for 12 h to obtain the Ce(OH)<sub>3</sub>/PAA-NH<sub>4</sub> NSs. The obtained Ce(OH)<sub>3</sub>/PAA-NH<sub>4</sub> NSs were centrifuged and washed several times by deionized water and anhydrous ethanol and finally dried at 50 °C for 24 h. Lastly, sample obtained in the previous step were calcined at 600 °C for 2 h to obtain CeO<sub>2</sub> NPs.

**Scavenging of  $O_2^{\cdot-}$ ,  $O_2^{\cdot-}$**  scavenging efficiency of Au-CeO<sub>2</sub> JNPs was assayed by measuring the inhibition ratio of the photoreduction of nitro blue tetrazolium (NBT). The Solutions containing riboflavin (20 µM), methionine (13 mM), NBT (75 µM), and Au-CeO<sub>2</sub> JNPs (12.5 µg/mL or 25

$\mu\text{g/mL}$ ) were prepared in PBS ( $\text{pH}=7.4$ ).  $\text{CeO}_2$  NPs ( $12.5 \mu\text{g/mL}$ ), Au NPs ( $5.3 \mu\text{g mL}^{-1}$ ),  $\text{CeO}_2$  NPs ( $7.2 \mu\text{g mL}^{-1}$ ), and cocktail (mixture of Au NPs and  $\text{CeO}_2$  NPs) were used as compared group. The compounds were illuminated under ultraviolet radiation for 15 min at  $25^\circ\text{C}$ . After irradiation, the absorbance of compounds was detected at once. The mixtures including riboflavin, methionine, and NBT were known as negative control. The mixtures including riboflavin, methionine, and NBT after irradiation were known as positive control. The whole operations were executed in dark.

**Scavenging of  $\text{H}_2\text{O}_2$ .** The elimination of  $\text{H}_2\text{O}_2$  was detected by monitoring its characteristic absorbance at 240 nm using UV-visible absorption spectroscopy. The Au- $\text{CeO}_2$  JNPs ( $12.5 \mu\text{g/mL}$  or  $25 \mu\text{g/mL}$ ),  $\text{CeO}_2$  NPs ( $12.5 \mu\text{g/mL}$ ), Au NPs ( $5.3 \mu\text{g mL}^{-1}$ ),  $\text{CeO}_2$  NPs ( $7.2 \mu\text{g mL}^{-1}$ ) and cocktail were mixed with  $\text{H}_2\text{O}_2$ , and then the ultraviolet absorption intensity of the mixture was scanned with time. According to the change of ultraviolet absorption intensity, the change of  $\text{H}_2\text{O}_2$  concentration could be obtained, thereby the removal effect of Au- $\text{CeO}_2$  JNPs on  $\text{H}_2\text{O}_2$  was acquired.

**Scavenging of  $\cdot\text{OH}$ .** The  $\cdot\text{OH}$  was generated through Fenton reaction of 1.8 mM  $\text{FeSO}_4$  and 5 mM  $\text{H}_2\text{O}_2$  for 10 min. Salicylic acid (1.8 mM) reacted with  $\cdot\text{OH}$  for 30 min to generate 2,3-dihydroxybenzoic acid, which had characteristic absorbance in 510 nm. When treated with Au- $\text{CeO}_2$  JNPs ( $12.5 \mu\text{g/mL}$  or  $25 \mu\text{g/mL}$ ),  $\text{CeO}_2$  NPs ( $12.5 \mu\text{g/mL}$ ), Au NPs ( $5.3 \mu\text{g mL}^{-1}$ ),  $\text{CeO}_2$  NPs ( $7.2 \mu\text{g mL}^{-1}$ ) and cocktail, the amount of  $\cdot\text{OH}$  scavenged was obtained by measuring the absorbance of 2,3-dihydroxybenzoic acid at 510 nm.

**Drug loading and releasing in vitro.** For DSS loading, 1 mL of free DSS ( $2 \text{ mg mL}^{-1}$ ) was incubated with Au- $\text{CeO}_2$  JNPs (2 mg) in deionized water at room temperature for 24 h. DSS

loaded Au-CeO<sub>2</sub> JNPs were obtained by centrifugation and washed with deionized water twice to remove the DSS adsorbed on the surface. The amount of original DSS and all the supernatants were determined by measuring the absorbance at 282 nm in UV-Vis spectrophotometer. The DSS loading efficiency (LE %) can be calculated by Equation (1):

$$LE (\%) = \frac{Abs_{(original\ DSS)} - Abs_{(residual\ DSS)}}{Abs_{(original\ DSS)}} \times 100\% \quad (1)$$

Release profile was assessed at 37 °C in phosphate buffered saline (PBS, pH= 7.4). The DSS-loaded Au-CeO<sub>2</sub> JNPs in PBS were placed in a centrifuge tube, which was kept releasing in a 37 °C bath without other conditions. The supernatant was carefully extracted by centrifuging and resuspended in 1 mL of fresh PBS. DSS concentration in the supernatant was determined by UV-Vis spectrophotometer at the absorbance of 282 nm.

**Cytotoxicity study.** The cytotoxicity of Au-CeO<sub>2</sub> JNPs on HNECs was carried out by MTT assays. The HNECs were seeded into 96-well plates and incubated in DMEM culture medium containing 10 % fetal bovine serum (FBS) under the atmosphere of 5 % CO<sub>2</sub> at 37 °C for 24 h. After the HNECs adhered to the wells, the initial DMEM was substituted by serum-free medium containing Au-CeO<sub>2</sub> JNPs at various concentrations for 24 h. The cell viability was determined by Equation (2):

$$Cell\ viability = \frac{Abs_{(test\ cells)}}{Abs_{(control\ cells)}} \times 100\% \quad (2)$$

**Isolation and culture of HNECs.** HNECs were freshly isolated from patients with Chronic rhinosinusitis with nasal polyps (CRSwNP), who had given their written informed consent in accordance with a study protocol approved by the Ethics Committee of China-Japan Union Hospital. Briefly, the nasal polyps was digested using 0.2 % pronase in culture medium at 4 °C for

16 hours for dissociation of the mucosal epithelial cells. After digestion, the dissociated cells were washed with PBS, followed by the centrifuge (1000 r, 5 min). The cell pellet was resuspended with culture medium (BEBM supplemented with BEGM SingleQuots) and plated on a 35 mm culture dish at 37 °C for 0.5 h to remove fibroblasts. Cells were then proliferated for seven to ten days on collagen-coated 3.5 cm<sup>2</sup> dishes (Thermo Scientific, Suzhou, China) in bronchial epithelial cell basal medium (BEGM), and then subjected to fetal bovine serum starvation. Once confluent, cells were trypsinized and re-seeded evenly on 3.5 cm<sup>2</sup> dishes (Thermo Scientific, Suzhou, China) coated with human collagen type IV (Sigma, Saint Louis, USA). When cells reached 80 % confluence, they were resuspended in BEGM and cultured for further usage. The expression levels of CK-18, Epcam and  $\alpha$ -SMA were detected by PCR to identify the HNECs. The PCR primer sequences for CK-18, Epcam,  $\alpha$ -SMA and  $\beta$ -actin are as follows:

|                        |                        |
|------------------------|------------------------|
| CK-18 Forward          | TCAGCAGATTGAGGAGAGCA   |
| CK-18 Reverse          | GAGTCCAGGTCGATCTCCAA   |
| Epcam Forward          | CTGCCAAATGTTTGGTGATG   |
| Epcam Reverse          | GCTCTCATCGCAGTCAGGAT   |
| $\alpha$ -SMA Forward  | CGTGTTGCCCCTGAAGAGCAT  |
| $\alpha$ -SMA Reverse  | ACCGCCTGGATAGCCACATACA |
| $\beta$ -actin Forward | GAGCACAGAGCCTCGCCTTT   |
| $\beta$ -actin Reverse | ATCCTTCTGACCCATGCCCA   |

**Intracellular ROS scavenging.** The level of intracellular ROS was detected by using DCFH-DA dye. DCFH-DA is a small organic molecule without a fluorescent signal that can be taken up into the cytosol by cells and subsequently hydrolyzed by intracellular esterases to produce DCFH.

DCFH can react with intracellular ROS to produce DCF with fluorescence signal (excitation wavelength at 488 nm; emission wavelength at 520 nm), and the intracellular ROS level can be obtained by detecting the fluorescence intensity of DCF. The specific process was as follows: HNECs were incubated in a 24-well plate for 24 h and then added LPS (1  $\mu\text{g/mL}$ , 500  $\mu\text{L}$ ) to increase intracellular ROS level. After 30 min, the cells were washed for three times with DMEM and then cultured with  $\text{CeO}_2$  NPs, Au- $\text{CeO}_2$  JNPs, DSS-loaded Au- $\text{CeO}_2$  JNPs (12.5  $\mu\text{g/mL}$ ), Au- $\text{CeO}_2$  JNPs (25  $\mu\text{g/mL}$ ) or free DSS for one hour. Then, the cells were washed for three times with DMEM and added DCFH-DA (0.01 mM, 500  $\mu\text{L}$ ), which was dissolved in serum-free DMEM, and after incubation for 30 min, the medium was washed off. Cell nucleus was dyed with Hoechst for confocal laser scan imaging. For the quantitative results, HNECs were monitored with flow cytometry by detecting the mean fluorescence intensity (MFI) of DCFH-DA fluorescence. Moreover, the ROS scavenging ability of Au- $\text{CeO}_2$  JNPs was also measured in Hela cells. The process of experiment was similar to that in the treatment of HNECs. Additionally, the fluorescence intensity was quantitatively measured by ImageJ software.

**Detection of SOD and MDA.** To determine the change in oxidative stress as showed by the SOD activity (U/mL) and MDA content (nmol/mL) after LPS and Au- $\text{CeO}_2$  JNPs treatment, the supernatant was collected and tested by the SOD and MDA kits.

**Reverse transcription-polymerase chain reaction (RT-PCR).** HNECs were incubated in a 6-well plate. After 24 h, the medium was removed, and the cells were cultured with LPS dissolved in culture medium. After 24 h, 12.5  $\mu\text{g/mL}$  of  $\text{CeO}_2$  NPs, 12.5  $\mu\text{g/mL}$  of Au- $\text{CeO}_2$  JNPs, free DSS and 12.5  $\mu\text{g/mL}$  of DSS-loaded Au- $\text{CeO}_2$  JNPs were added for another 6 hours, respectively. Then, a RNA aqueous kit was used to isolate RNA from HNECs. For single-stranded cDNA synthesis, 1

μg (for cell lines) of total RNA was reverse transcribed using the RT-Systems supplied by Promega (Promega Corporation, Madison, USA). Quantitative real-time RT-PCR was carried out on a Master Cycler (Eppendorf). The PCR of cytokines IL-1β and IL-6 were performed by using the SYBR Premix Ex Taq kit (TaKaRa Biotechnology, Dalian, China) with appropriate primers constructed from published sequences. Relative gene expression was calculated by using the comparative CT method. A 0 h hypoxia or normoxia exposure sample was used as a calibrator. GAPDH was used as a housekeeping gene for normalization, and a no template sample was used as a negative control. The PCR primer sequences are as follows:

|               |                      |
|---------------|----------------------|
| IL-1β Forward | ACGAATCTCCGACCACCACT |
| IL-1β Reverse | GGCAGGGAACCAGCATCTTC |
| IL-6 Forward  | ACACAGACAGCCACTCACCT |
| IL-6 Reverse  | TTCTGCCAGTGCCTCTTTGC |

**CT imaging of Au-CeO<sub>2</sub> JNPs.** The CT images of Au-CeO<sub>2</sub> JNPs samples in PBS with various Au concentrations (0, 0.56, 1.12, 2.34, 5.46 and 8.88 mg mL<sup>-1</sup>) were obtained by using a SIEMENS SOMATOM Sensation 64 with a tube voltage of 120 kV, an electrical current of 280 mA, and a slice thickness of 1 mm. Phantom images were treated by using a standard image viewer application to measure the mean HU variation of the acquired image depending on the Au concentration.

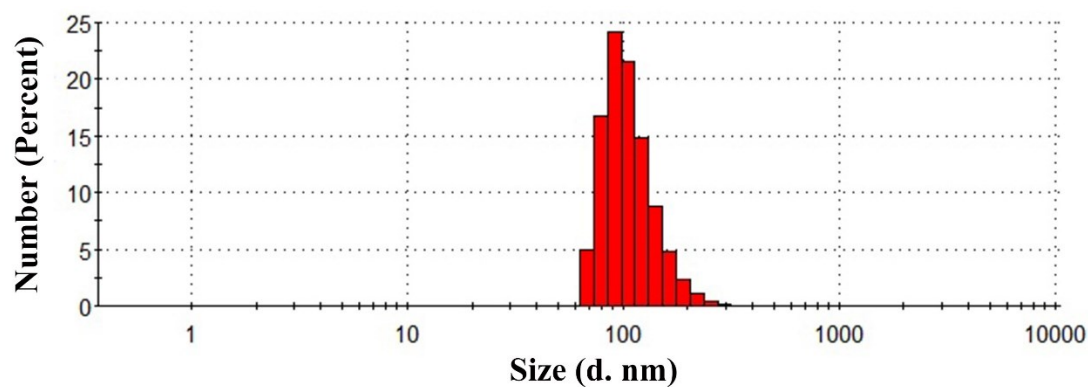

**Figure S1.** DLS size distribution of the nanoparticles.

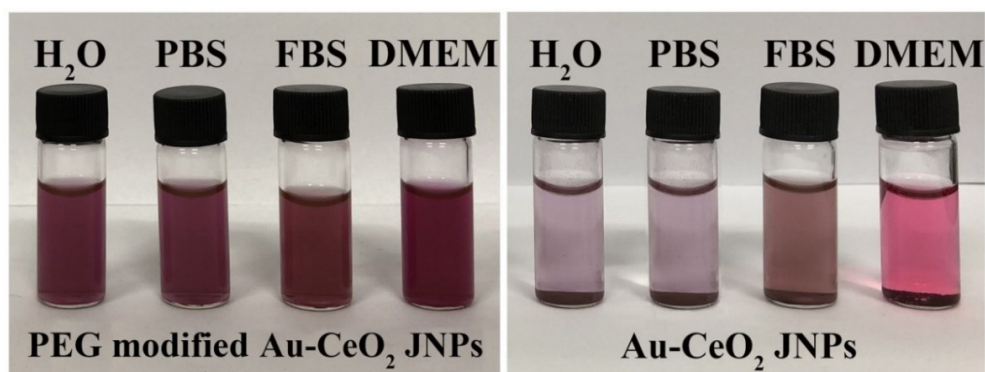

**Figure S2.** Photographs of Au-CeO<sub>2</sub> JNPs modified with and without PEG in H<sub>2</sub>O, PBS, FBS and culture medium (DMEM) for 24 h, respectively.

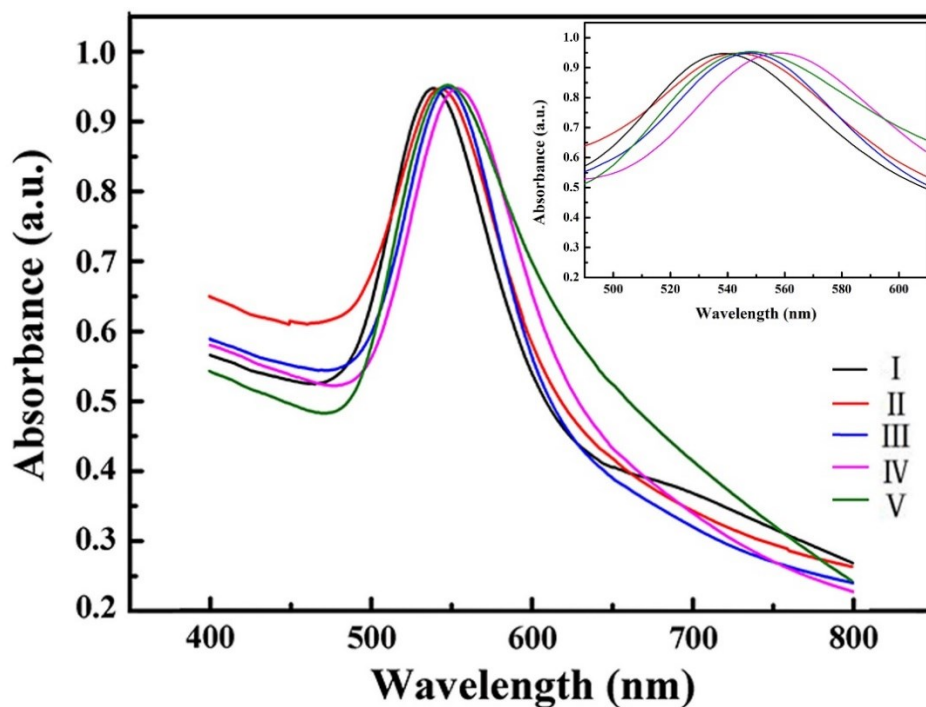

**Figure S3.** UV-Vis spectra of (I) Au NPs, (II) Au-PAA JNPs, (III) Au-Ce(OH)<sub>3</sub> JNPs, (IV) (Janus Au-Ce(OH)<sub>3</sub>)@SiO<sub>2</sub> NPs and (V) Au-CeO<sub>2</sub> JNPs.

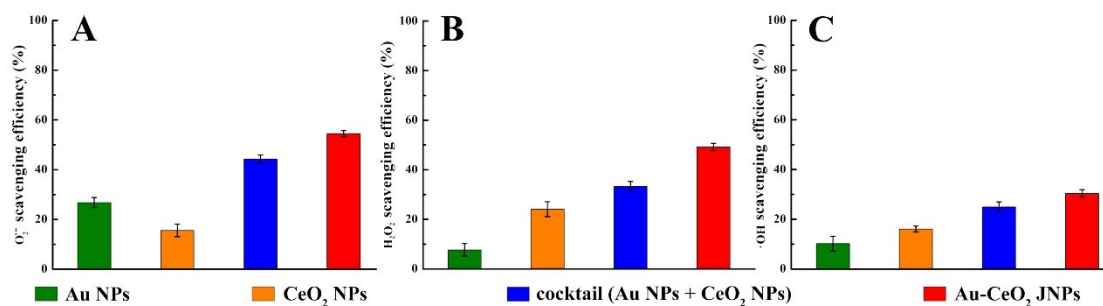

**Figure S4.** The scavenging efficiency of Au NPs, CeO<sub>2</sub> NPs, cocktail (mixture of Au NPs and CeO<sub>2</sub> NPs), and Au-CeO<sub>2</sub> JNPs to (A)  $O_2^{\cdot-}$ , (B) H<sub>2</sub>O<sub>2</sub>, and (C)  $\cdot OH$ .

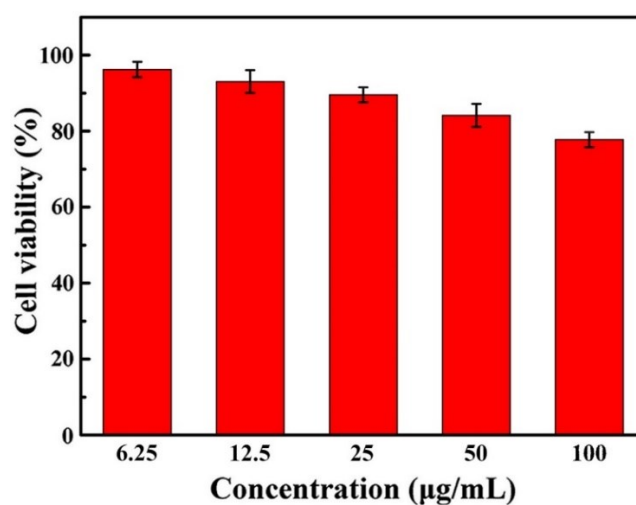

**Figure S5.** Cytotoxicity of HNECs after incubation with various concentrations of Au-CeO<sub>2</sub> JNPs for 24 h.

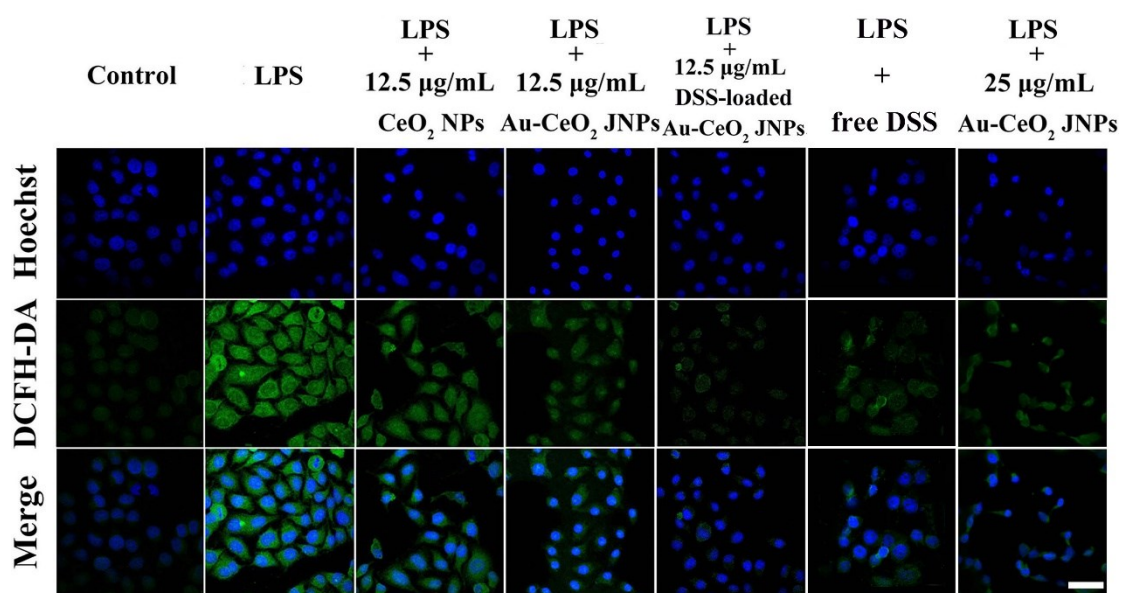

**Figure S6.** Confocal fluorescence images of ROS levels in LPS-treated Hela cells upon various treatments using DCFH-DA as the ROS probe. Scale bar was equal to 25 µm.

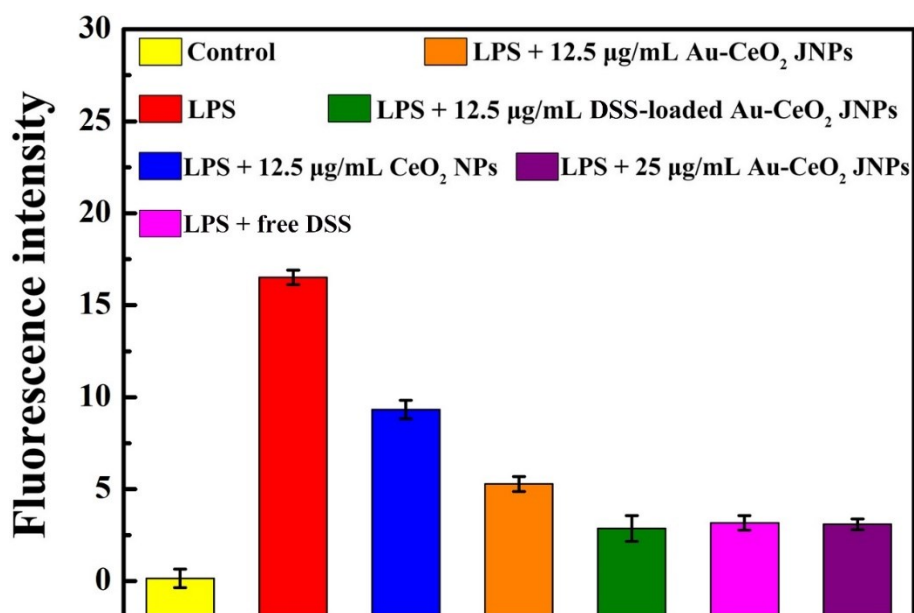

**Figure S7.** The corresponding quantitative information for confocal fluorescence images of ROS levels in LPS-treated HNECs.

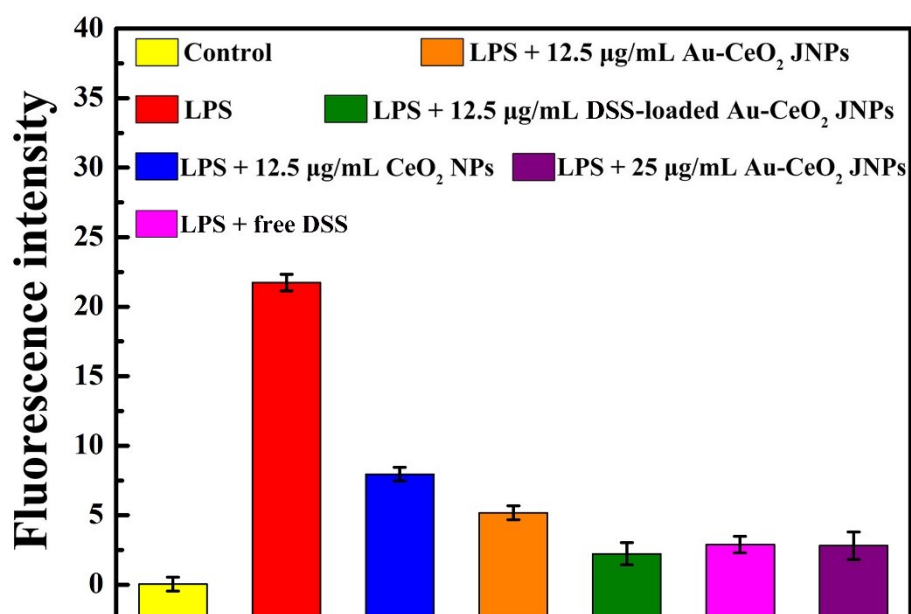

**Figure S8.** The corresponding quantitative information for confocal fluorescence images of ROS levels in LPS-treated Hela cells.
